# Supplementary material for: The absorption and fluorescence emission spectra of meso-tetra(aryl)porphyrin dications with weak and strong carboxylic acids: a comparative study
Source: Royal Society of Chemistry journal article supplement (doi:10.1039/c5ra20445c), 2015-01-01
Supplement: c5ra20445c1.pdf [file c5ra20445c1.pdf]

# Supplementary Information for

## The absorption and fluorescence emission spectra of meso-tetra(aryl)porphyrin dications with weak and strong carboxylic acids: a comparative study

Saeed Zakavi\*<sup>a</sup> and Saiedeh Hoseini<sup>a</sup>

<sup>a</sup>Department of Chemistry, Institute for Advanced Studies in Basic Sciences (IASBS), Zanjan 45137-66731, Iran. E-mail: zakavi@iasbs.ac.ir

### Contents:

**S1a:** <sup>1</sup>H NMR, <sup>13</sup>C NMR and UV-Vis spectral data of the porphyrins

**S1b:** <sup>1</sup>H NMR, <sup>13</sup>C NMR and UV-Vis spectral data of the porphyrins dications

**S2** The UV-Vis spectral data of the free base porphyrins in CH<sub>2</sub>Cl<sub>2</sub>

**S3-1** The UV-Vis spectral data of some electron-rich and electron-deficient free base porphyrins and their dications with CF<sub>3</sub>COOH in CH<sub>2</sub>Cl<sub>2</sub>

**S3-2** The UV-Vis spectral data of some electron-rich and electron-deficient free base porphyrins and their dications with HCOOH in CH<sub>2</sub>Cl<sub>2</sub>

**S3-3** The structure of porphyrins of S3-1 and S3-2

**S4** The emission spectra of the free base porphyrins in CH<sub>2</sub>Cl<sub>2</sub>

**S5** The fluorescence spectral data of the free base porphyrins in CH<sub>2</sub>Cl<sub>2</sub>

**S6** Absorption (Q region) and emission spectra of the porphyrin dications with CF<sub>3</sub>COOH in CH<sub>2</sub>Cl<sub>2</sub> solutions normalized to each other at their respective Q maxima

**S7** The emission spectra of the porphyrin dications with HCOOH in CH<sub>2</sub>Cl<sub>2</sub>

**S8** Absorption (Q region) and emission spectra of the H<sub>4</sub>T(2-Cl)PP(HCOO)<sub>2</sub> in CH<sub>2</sub>Cl<sub>2</sub> solution normalized to its Q maxima

### S1a: <sup>1</sup>H NMR, <sup>13</sup>C NMR and UV-Vis spectral data of the porphyrins

**H<sub>2</sub>TPP.** <sup>1</sup>H NMR (400 MHz, CDCl<sub>3</sub>, TMS), δ/ppm: -2.77 (2H, br, s, NH), 7.77-7.84 (8H<sub>m</sub> and 4H<sub>p</sub>, m), 8.26-8.27 (8H<sub>o</sub>, d), 8.90 (8H<sub>β</sub>, s); <sup>13</sup>C NMR (~100 MHz, CDCl<sub>3</sub>, TMS), δ/ppm: 120.18 (C<sub>meso</sub>), 142.20 (C<sub>1</sub>), 134.60 (C<sub>2</sub>, C<sub>6</sub>), 126.73 (C<sub>3</sub>, C<sub>5</sub>), 127.75 (C<sub>4</sub>), 131.5 (C<sub>β</sub>); UV-vis in CH<sub>2</sub>Cl<sub>2</sub>, λ<sub>max</sub>/nm (logε): 417 (5.79), 513 (4.58), 548 (4.38), 590 (4.30), 647 (4.29).

**H<sub>2</sub>T(4-OMe)PP.** <sup>1</sup>H NMR (400MHz, CDCl<sub>3</sub>, TMS), δ/ppm: -2.72 (2H, br, s, NH), 7.29-7.32 (8H<sub>m</sub>, d), 8.15-8.17 (8H<sub>o</sub>, d), 8.89 (8H<sub>β</sub>, s), 4.13 (12H<sub>Me</sub>, s); <sup>13</sup>C NMR (~100MHz, CDCl<sub>3</sub>, TMS), δ/ppm: 119.75 (C<sub>meso</sub>), 134.67 (C<sub>1</sub>), 135.62 (C<sub>2</sub>, C<sub>6</sub>), 112.20 (C<sub>3</sub>, C<sub>5</sub>), 159.39 (C<sub>4</sub>), 131.34 (C<sub>β</sub>), 55.61 (C<sub>Me</sub>); UV-vis in CH<sub>2</sub>Cl<sub>2</sub>, λ<sub>max</sub>/nm (logε)= 421 (5.61), 517 (4.32), 555 (4.22), 593 (4.06), 651 (4.11).

**H<sub>2</sub>T(2-Me)PP.** <sup>1</sup>H NMR (400 MHz, CDCl<sub>3</sub>, TMS), δ/ppm: -2.59 (2H, br, s, NH), 7.54-7.74 (8H<sub>m</sub> and 4H<sub>p</sub>, m, meta and para-position relative to C atom attached to meso position), 7.99-8.11 (4H<sub>o</sub>, m, ortho-position relative to C atom attached to meso position), 8.70 (8H<sub>β</sub>, s), 2.01-2.11 (12H<sub>Me</sub>, m); <sup>13</sup>C NMR (~100 MHz, CDCl<sub>3</sub>, TMS), δ/ppm: 118.82 (C<sub>meso</sub>), 139.54 (C<sub>1</sub>), 139.63 (C<sub>2</sub>), 128.38 (C<sub>3</sub>), 129.22 (C<sub>4</sub>), 124.21 (C<sub>5</sub>), 133.90 (C<sub>6</sub>), 141.48 (C<sub>α</sub>), 129.22 (C<sub>β</sub>), 21.37 (C<sub>Me</sub>); UV-vis in CH<sub>2</sub>Cl<sub>2</sub>, λ<sub>max</sub>/nm (logε): 416 (6.04), 512 (4.74), 545 (4.34), 589 (4.34), 645 (4.25).

**H<sub>2</sub>T(4-Me)PP.** <sup>1</sup>H NMR (400 MHz, CDCl<sub>3</sub>, TMS), δ/ppm: -2.76 (2H, br, s, NH), 7.55-7.58 (8H<sub>m</sub>, d), 8.09-8.12 (8H<sub>o</sub>, d), 8.86 (8H<sub>β</sub>, s), 2.65 (12H<sub>Me</sub>, s); <sup>13</sup>C NMR (~100 MHz, CDCl<sub>3</sub>, TMS), δ/ppm: 120.47 (C<sub>meso</sub>), 139.73 (C<sub>1</sub>), 134.92 (C<sub>2</sub>, C<sub>6</sub>), 127.81 (C<sub>3</sub>, C<sub>5</sub>), 137.71 (C<sub>4</sub>), 131.37 (C<sub>β</sub>), 21.57 (C<sub>Me</sub>); UV-vis in CH<sub>2</sub>Cl<sub>2</sub>, λ<sub>max</sub>/nm (logε): 418 (5.89), 516 (4.54), 551 (4.34), 590 (4.18), 647 (4.20).

**H<sub>2</sub>T(2-Cl)PP.** <sup>1</sup>H NMR (400MHz, CDCl<sub>3</sub>, TMS), δ/ppm: -2.62 (2H, br, s, NH), 7.66-7.87 (8H<sub>m</sub> and 4H<sub>p</sub>, m, meta and para-position relative to C atom attached to meso position), 8.10-8.26 (4H<sub>o</sub>, m, ortho-position relative to C atom attached to meso position), 8.72 (8H<sub>β</sub>, s); <sup>13</sup>C NMR (~100 MHz, CDCl<sub>3</sub>, TMS), δ/ppm: 116.76 (C<sub>meso</sub>), 137.10 (C<sub>1</sub>), 136.94 (C<sub>2</sub>), 129.01 (C<sub>3</sub>), 129.93 (C<sub>4</sub>), 125.32 (C<sub>5</sub>), 135.52 (C<sub>6</sub>), 140.50 (C<sub>α</sub>), 135.39 (C<sub>β</sub>); UV-vis in CH<sub>2</sub>Cl<sub>2</sub>, λ<sub>max</sub>/nm (logε): 416 (5.64), 512 (4.47), 543 (4.07), 587 (4.15), 643 (3.96).

**H<sub>2</sub>T(4-Cl)PP.** <sup>1</sup>H NMR (400 MHz, CDCl<sub>3</sub>, TMS), δ/ppm: -2.83 (2H, br, s, NH), 7.77-7.79 (8H<sub>m</sub>, d), 8.15-8.17 (8H<sub>o</sub>, d), 8.87 (8H<sub>β</sub>, s); <sup>13</sup>C NMR (~100 MHz, CDCl<sub>3</sub>, TMS), δ/ppm: 119.01 (C<sub>meso</sub>), 140.37 (C<sub>1</sub>), 135.52 (C<sub>2</sub>, C<sub>6</sub>), 127.07 (C<sub>3</sub>, C<sub>5</sub>), 134.41 (C<sub>4</sub>), 131.64 (C<sub>β</sub>); UV-vis in CH<sub>2</sub>Cl<sub>2</sub>, λ<sub>max</sub>/nm (logε): 418 (5.79), 513 (4.52), 547 (4.25), 590 (4.16), 647 (4.10).

**H<sub>2</sub>T(thien-2-yl)P.** <sup>1</sup>H NMR (400 MHz, CDCl<sub>3</sub>, TMS), δ/ppm: -2.65 (2H, br, s, NH); 7.48-7.51(4H, m); 7.84-7.86 (4H, m); 7.907-7.920 (4H, m); 9.03 (8H, s, β); UV-vis in CH<sub>2</sub>Cl<sub>2</sub>, λ<sub>max</sub>/nm (logε): (See ESI,† S3-1).

**H<sub>2</sub>T(4-SCH<sub>3</sub>)PP.** <sup>1</sup>H NMR (400 MHz, CDCl<sub>3</sub>, TMS), δ/ppm: 8.82 (s, 8H, H<sub>β</sub>), 8.07 (d, 8H, H<sub>o</sub>), 7.58 (d, 8H, H<sub>m</sub>), 2.70 (s, 12H, CH<sub>3</sub>), -2.84 (s, 2H, NH); UV-vis in CH<sub>2</sub>Cl<sub>2</sub>, λ<sub>max</sub>/nm (logε): (See ESI,† S3-1).

**H<sub>2</sub>T(2-NO<sub>2</sub>)PP.** <sup>1</sup>H NMR (400 MHz, DMSO-d<sub>6</sub>, TMS), δ/ppm: -2.83 (s, 2H, NH), 8.61 (s, 8H, H<sub>β</sub>), 8.30 (m, 4H, H<sub>o</sub>), 8.45 (m, 8H, H<sub>m</sub>), 7.98 (m, 4H, H<sub>p</sub>); UV-vis in CH<sub>2</sub>Cl<sub>2</sub>, λ<sub>max</sub>/nm (logε): (See ESI,† S3-1).

**H<sub>2</sub>T(2,6-Cl)PP.** <sup>1</sup>H NMR (400 MHz, CDCl<sub>3</sub>, TMS), δ/ppm: -2.59 (2H, br, s, NH), 7.68 (12H, m, H<sub>m,p</sub>), 8.66 (8H, s, H<sub>β</sub>); UV-vis in CH<sub>2</sub>Cl<sub>2</sub>, λ<sub>max</sub>/nm (logε): (See ESI,† S3-1).

### S1b: <sup>1</sup>H NMR, <sup>13</sup>C NMR and UV-Vis spectral data of the porphyrins dications

**H<sub>4</sub>TPP(CF<sub>3</sub>COO)<sub>2</sub>.** <sup>1</sup>H NMR (400 MHz, CDCl<sub>3</sub>, TMS), δ/ppm: 0.276 (4H, br, s, NH), 7.99-8.043 (8H<sub>m</sub> and 4H<sub>p</sub>, m), 8.616-8.652 (8H<sub>o</sub>, m), 8.616-8.652 (8H<sub>β</sub>, m); <sup>13</sup>C NMR (~100MHz, CDCl<sub>3</sub>, TMS), δ/ppm: 122.77 (C<sub>meso</sub>), 139.90 (C<sub>1</sub>), 138.52 (C<sub>2</sub>, C<sub>6</sub>), 128.31 (C<sub>3</sub>, C<sub>5</sub>), 130.01 (C<sub>4</sub>), 145.72 (C<sub>α</sub>), 128.31 (C<sub>β</sub>); UV-vis in CH<sub>2</sub>Cl<sub>2</sub>, λ<sub>max</sub>/nm (logε): 437 (5.83), 600 (4.46), 652 (4.93).

**H<sub>4</sub>T(4-OMe)PP(CF<sub>3</sub>COO)<sub>2</sub>.** <sup>1</sup>H NMR (400 MHz, CDCl<sub>3</sub>, TMS), δ/ppm: 0.425 (4H, br, s, NH), 7.553-8.573 (8H<sub>m</sub>, d), 8.527-8.562 (8H<sub>β</sub>, 8H<sub>o</sub>, br), 4.195 (12H<sub>Me</sub>, s); <sup>13</sup>C NMR (~100MHz, CDCl<sub>3</sub>, TMS), δ/ppm: 122.09 (C<sub>meso</sub>), 133.44 (C<sub>1</sub>), 140.01 (C<sub>2</sub>, C<sub>6</sub>), 114.01 (C<sub>3</sub>, C<sub>5</sub>), 161.49 (C<sub>4</sub>), 146.11 (C<sub>α</sub>), 127.75 (C<sub>β</sub>), 55.84 (C<sub>Me</sub>); UV-vis in CH<sub>2</sub>Cl<sub>2</sub>, λ<sub>max</sub>/nm (logε): 449 (5.77), 686 (5.07).

**H<sub>4</sub>T(2-Me)PP(CF<sub>3</sub>COO)<sub>2</sub>.** <sup>1</sup>H NMR (400 MHz, CDCl<sub>3</sub>, TMS), δ/ppm: -0.954 (4H, br, s, NH), 7.721-7.895 (8H<sub>m</sub> and 4H<sub>p</sub>, br, meta and para-positions relative to C atom attached to the meso position), 8.181-8.216 (4H<sub>o</sub>, br, ortho-position relative to the C atom attached to the meso position), 8.651-8.682 (8H<sub>β</sub>, s), 2.208-2.285 (H<sub>Me</sub>, m); <sup>13</sup>C NMR (~100 MHz, CDCl<sub>3</sub>, TMS), δ/ppm:

121.47 ( $C_{\text{meso}}$ ), 138.33 ( $C_1$ ), 140.86 ( $C_2$ ), 128.41 ( $C_3$ ), 129.08 ( $C_4$ ), 125.39 ( $C_5$ ), 136.62 ( $C_6$ ), 145.51 ( $C_a$ ), 130.54 ( $C_\beta$ ), 21.87 ( $C_{\text{Me}}$ ); UV-vis in  $\text{CH}_2\text{Cl}_2$ ,  $\lambda_{\text{max}}/\text{nm}$  ( $\log\epsilon$ ): 432 (5.99), 583 (6.46), 633 (4.89).

**$\text{H}_4\text{T(4-Me)PP}(\text{CF}_3\text{COO})_2$** .  $^1\text{H}$  NMR (400MHz,  $\text{CDCl}_3$ , TMS),  $\delta/\text{ppm}$ : 0.42 (4H, br, s, NH), 7.79-7.82 ( $8\text{H}_m$ , d), 8.46-8.49 ( $8\text{H}_o$ , d), 8.55 ( $8\text{H}_\beta$ , s), 2.67 ( $12\text{H}_{\text{Me}}$ , s);  $^{13}\text{C}$  NMR ( $\sim 100\text{MHz}$ ,  $\text{CDCl}_3$ , TMS),  $\delta/\text{ppm}$ : 122.60 ( $C_{\text{meso}}$ ), 137.56 ( $C_1$ ), 138.62 ( $C_2$ ,  $C_6$ ), 129.12 ( $C_3$ ,  $C_5$ ), 140.31 ( $C_4$ ), 145.85 ( $C_a$ ), 127.95 ( $C_\beta$ ), 21.68 ( $C_{\text{Me}}$ ); UV-vis in  $\text{CH}_2\text{Cl}_2$ ,  $\lambda_{\text{max}}/\text{nm}$  ( $\log\epsilon$ ): 442 (5.85), 666 (5.01).

**$\text{H}_2\text{T(thien-2-yl)P}(\text{CF}_3\text{COO})_2$** .  $^1\text{H}$  NMR (400MHz,  $\text{CDCl}_3$ , TMS),  $\delta/\text{ppm}$ : 1.53 (4H, br, s, NH); 7.78-7.814 (4H, dd); 8.26-8.28 (4H, d); 8.37-8.38 (4H, d); 8.58 (8H, s,  $\beta$ ); UV-vis in  $\text{CH}_2\text{Cl}_2$ ,  $\lambda_{\text{max}}/\text{nm}$  ( $\log\epsilon$ ): (See ESI,† S3-2).

**$\text{H}_2\text{T(4-SCH}_3\text{)PP}(\text{CF}_3\text{COO})_2$** .  $^1\text{H}$  NMR (400 MHz,  $\text{CDCl}_3$ , TMS),  $\delta/\text{ppm}$ : 8.77 (s,  $8\text{H}_m, \text{H}_\beta$ ), 8.33 (d,  $8\text{H}_o, \text{H}_o$ ), 7.88 (d,  $8\text{H}_m, \text{H}_m$ ), 3.12 (s,  $12\text{H}_m, \text{CH}_3$ ), 0.2 (s,  $4\text{H}_m, \text{NH}$ ); UV-vis in  $\text{CH}_2\text{Cl}_2$ ,  $\lambda_{\text{max}}/\text{nm}$  ( $\log\epsilon$ ): (See ESI,† S3-2).

**$\text{H}_2\text{T(2-NO}_2\text{)PP}(\text{CF}_3\text{COO})_2$** .  $^1\text{H}$  NMR (400 MHz,  $\text{CDCl}_3$ , TMS),  $\delta/\text{ppm}$ : 1.25 (s,  $4\text{H}_m, \text{NH}$ ), 8.53 (s,  $8\text{H}_m, \text{H}_\beta$ ), 8.10 (m,  $4\text{H}_m, \text{H}_o$ ), 8.30 (m,  $8\text{H}_m, \text{H}_m$ ), 8.10 (m,  $4\text{H}_m, \text{H}_\beta$ ); UV-vis in  $\text{CH}_2\text{Cl}_2$ ,  $\lambda_{\text{max}}/\text{nm}$  ( $\log\epsilon$ ): (See ESI,† S3-2).

**$\text{H}_2\text{T(2,6-Cl)PP}(\text{CF}_3\text{COO})_2$** .  $^1\text{H}$  NMR (400 MHz,  $\text{CDCl}_3$ , TMS),  $\delta/\text{ppm}$ : 0.5 (4H, br, s, NH), 7.8-8.0 (12H, m,  $\text{H}_{m,p}$ ), 8.79 (8H, s,  $\text{H}_\beta$ ); UV-vis in  $\text{CH}_2\text{Cl}_2$ ,  $\lambda_{\text{max}}/\text{nm}$  ( $\log\epsilon$ ): (See ESI,† S3-2).

**$\text{H}_4\text{T(4-Cl)PP}(\text{HCOO})_2$** .  $^1\text{H}$  NMR (400 MHz,  $\text{CDCl}_3$ , TMS),  $\delta/\text{ppm}$ : 7.746 ( $8\text{H}_m$ , d), 8.4 ( $8\text{H}_o$ , d), 8.674 ( $8\text{H}_\beta$ , s); no signal was observed for the NH protons at  $20^\circ\text{C}$ , but at  $-60^\circ\text{C}$ , the NH resonance was observed at  $\delta$  0.19  $\text{ppm}^{-1}$ ;  $^{13}\text{C}$  NMR ( $\sim 100$  MHz,  $\text{CDCl}_3$ , TMS),  $\delta/\text{ppm}$ : 122.17 ( $C_{\text{meso}}$ ), 138.09 ( $C_1$ ), 139.59 ( $C_2$ ,  $C_6$ ), 129.19 ( $C_3$ ,  $C_5$ ), 137.54 ( $C_4$ ), 145.66 ( $C_a$ ), 128.94 ( $C_\beta$ ); UV-vis in  $\text{CH}_2\text{Cl}_2$ ,  $\lambda_{\text{max}}/\text{nm}$  ( $\log\epsilon$ ): 442 (5.65), 662 (4.91).

**$\text{H}_4\text{T(2-Cl)PP}(\text{CF}_3\text{COO})_2$** .  $^1\text{H}$  NMR (400 MHz,  $\text{CDCl}_3$ , TMS),  $\delta/\text{ppm}$ : 1.5 (4H, br, s, NH), 7.77-7.938 ( $8\text{H}_m$  and  $4\text{H}_p$ , m, meta and para-positions relative to the C atom attached to the meso position), 8.29 ( $4\text{H}_o$ , br, ortho-position relative to C atom attached to the meso position), 8.681 ( $8\text{H}_\beta$ , s);  $^{13}\text{C}$  NMR ( $\sim 100$  MHz,  $\text{CDCl}_3$ , TMS),  $\delta/\text{ppm}$ : 117.99 ( $C_{\text{meso}}$ ), 137.39 ( $C_1$ ), 137.72 ( $C_2$ ), 129.58 ( $C_3$ ,  $C_4$ ), 125.88 ( $C_5$ ), 136.75 ( $C_6$ ), 146.16 ( $C_a$ ), 131.04 ( $C_\beta$ ); UV-vis in  $\text{CH}_2\text{Cl}_2$ ,  $\lambda_{\text{max}}/\text{nm}$  ( $\log\epsilon$ ): 431 (5.76), 580 (4.69), 632 (4.75).

**$\text{H}_4\text{T(4-Cl)PP}(\text{CF}_3\text{COO})_2$** .  $^1\text{H}$  NMR (400 MHz,  $\text{CDCl}_3$ , TMS),  $\delta/\text{ppm}$ : 0.392 (4H, br, s, NH), 8.026-8.046 ( $8\text{H}_m$ , d), 8.518-8.539 ( $8\text{H}_o$ , d), 8.635 ( $8\text{H}_\beta$ , s);  $^{13}\text{C}$  NMR ( $\sim 100$  MHz,  $\text{CDCl}_3$ , TMS),  $\delta/\text{ppm}$ : 121.73 ( $C_{\text{meso}}$ ), 138.11 ( $C_1$ ), 139.22 ( $C_2$ ,  $C_6$ ), 128.81 ( $C_3$ ,  $C_5$ ), 137.50 ( $C_4$ ), 145.67 ( $C_a$ ), 128.38 ( $C_\beta$ ); UV-vis in  $\text{CH}_2\text{Cl}_2$ ,  $\lambda_{\text{max}}/\text{nm}$  ( $\log\epsilon$ ): 439 (6.06), 656 (5.16).

**$\text{H}_4\text{TTPP}(\text{HCOO})_2$** .  $^1\text{H}$  NMR (400 MHz,  $\text{CDCl}_3$ , TMS),  $\delta/\text{ppm}$ : 7.777 ( $8\text{H}_m$  and  $4\text{H}_p$ , d), 8.174 ( $8\text{H}_o$ , d), 8.828 ( $8\text{H}_\beta$ , s); no signal was observed for the NH protons at  $20^\circ\text{C}$ , but at  $-60^\circ\text{C}$ , the NH resonance was observed at  $\delta$  0.49  $\text{ppm}^{-1}$ ;  $^{13}\text{C}$  NMR ( $\sim 100$  MHz,  $\text{CDCl}_3$ , TMS),  $\delta/\text{ppm}$ : 123.26 ( $C_{\text{meso}}$ ), 139.23 ( $C_1$ ), 138.85 ( $C_2$ ,  $C_6$ ), 129 ( $C_3$ ,  $C_5$ ), 130.70 ( $C_4$ ), 145.67 ( $C_a$ ), 128.78 ( $C_\beta$ ); UV-vis in  $\text{CH}_2\text{Cl}_2$ ,  $\lambda_{\text{max}}/\text{nm}$  ( $\log\epsilon$ ): 439 (5.75), 604 (4.42), 657 (4.89).

**$\text{H}_4\text{T(4-OMe)PP}(\text{HCOO})_2$** .  $^1\text{H}$  NMR (400MHz,  $\text{CDCl}_3$ , TMS),  $\delta/\text{ppm}$ : 7.532 ( $8\text{H}_m$ , d), 8.547 ( $8\text{H}_o$ , d), 8.56 ( $8\text{H}_\beta$ , s), 4.162 ( $12\text{H}_{\text{Me}}$ , s); no signal was observed for the NH protons at  $20^\circ\text{C}$ , but at  $-60^\circ\text{C}$ , the NH resonance was observed at  $\delta$  0.42  $\text{ppm}^{-1}$ ;  $^{13}\text{C}$  NMR ( $\sim 100\text{MHz}$ ,  $\text{CDCl}_3$ , TMS),  $\delta/\text{ppm}$ : 122.59 ( $C_{\text{meso}}$ ), 132.67 ( $C_1$ ), 140.31 ( $C_2$ ,  $C_6$ ), 114.62 ( $C_3$ ,  $C_5$ ), 162.13 ( $C_4$ ), 145.99 ( $C_a$ ), 128.46 ( $C_\beta$ ), 55.89 ( $C_{\text{Me}}$ ); UV-vis in  $\text{CH}_2\text{Cl}_2$ ,  $\lambda_{\text{max}}/\text{nm}$  ( $\log\epsilon$ ): 452 (5.36), 695 (4.73).

**$\text{H}_4\text{T(2-Me)PP}(\text{HCOO})_2$** .  $^1\text{H}$  NMR (400 MHz,  $\text{CDCl}_3$ , TMS),  $\delta/\text{ppm}$ : 7.863-7.9 ( $8\text{H}_m$  and  $4\text{H}_p$ , br, meta and para-position relative to C atom attached to meso position), 8.254-8.332 ( $4\text{H}_o$ , br, ortho-position relative to C atom attached to meso position), 8.73-8.76 ( $8\text{H}_\beta$ , br), 2.144-2.203 ( $\text{H}_{\text{Me}}$ , m); no signal was observed for the NH protons at  $20^\circ\text{C}$ ;  $^{13}\text{C}$  NMR ( $\sim 100$  MHz,  $\text{CDCl}_3$ , TMS),  $\delta/\text{ppm}$ : 121.69 ( $C_{\text{meso}}$ ), 138.12 ( $C_1$ ), 140.86 ( $C_2$ ), 129.53 ( $C_3$ ), 129.56 ( $C_4$ ), 125.62 ( $C_5$ ), 136.54 ( $C_6$ ), 145.63 ( $C_a$ ), 130.60 ( $C_\beta$ ), 21.03 ( $C_{\text{Me}}$ ); UV-vis in  $\text{CH}_2\text{Cl}_2$ ,  $\lambda_{\text{max}}/\text{nm}$  ( $\log\epsilon$ ): 433 (5.79), 582 (4.49), 635 (4.69).

**$\text{H}_4\text{T(4-Me)PP}(\text{HCOO})_2$** .  $^1\text{H}$  NMR (400 MHz,  $\text{CDCl}_3$ , TMS),  $\delta/\text{ppm}$ : 7.88-7.91 ( $8\text{H}_m$ , d), 8.533-8.553 ( $8\text{H}_o$ , d), 8.7 ( $8\text{H}_\beta$ , s), 2.767 ( $12\text{H}_{\text{Me}}$ , s); no signal was observed for the NH protons at  $20^\circ\text{C}$ ;  $^{13}\text{C}$  NMR ( $\sim 100$  MHz,  $\text{CDCl}_3$ , TMS),  $\delta/\text{ppm}$ : 123.1 ( $C_{\text{meso}}$ ), 136.87 ( $C_1$ ), 138.86 ( $C_2$ ,  $C_6$ ), 129.63 ( $C_3$ ,  $C_5$ ), 141.34 ( $C_4$ ), 145.75 ( $C_a$ ), 128.68 ( $C_\beta$ ), 21.62 ( $C_{\text{Me}}$ ); UV-vis in  $\text{CH}_2\text{Cl}_2$ ,  $\lambda_{\text{max}}/\text{nm}$  ( $\log\epsilon$ ): 443 (5.88), 672 (5.09).

**$\text{H}_4\text{T(2-Cl)PP}(\text{HCOO})_2$** .  $^1\text{H}$  NMR (400 MHz,  $\text{CDCl}_3$ , TMS),  $\delta/\text{ppm}$ : 7.92-7.95 ( $8\text{H}_m$  and  $4\text{H}_p$ , br, meta and para-positions relative to the C atom attached to the meso position), 8.4-8.5 ( $4\text{H}_o$ , br, ortho-position relative to C atom attached to meso position), 8.78-8.826 ( $8\text{H}_\beta$ , br); no signal was observed for the NH protons at  $20^\circ\text{C}$ ;  $^{13}\text{C}$  NMR ( $\sim 100\text{MHz}$ ,  $\text{CDCl}_3$ , TMS),  $\delta/\text{ppm}$ : 119.24 ( $C_{\text{meso}}$ ), 137.83 ( $C_1$ ), 138.02 ( $C_2$ ), 129.87 ( $C_3$ ,  $C_4$ ), 126.62 ( $C_5$ ), 136.84 ( $C_6$ ), 145.57 ( $C_a$ ), 132.55 ( $C_\beta$ ); UV-vis in  $\text{CH}_2\text{Cl}_2$ ,  $\lambda_{\text{max}}/\text{nm}$  ( $\log\epsilon$ ): 432 (5.65), 580 (4.41), 631 (4.52).

**H<sub>2</sub>T(thien-2-yl)P(HCOO)<sub>2</sub>.** <sup>1</sup>H NMR (400MHz, CDCl<sub>3</sub>, TMS), δ/ppm: 7.81-7.83 (4H, dd); 8.38-8.39 (4H, d); 8.43-8.44 (4H, d); 8.69 (8H, s, β); no signal was observed for the NH protons at 20 °C<sup>1</sup>; UV-vis in CH<sub>2</sub>Cl<sub>2</sub>, λ<sub>max</sub>/nm (logε): (See ESI,† S3-2).

**H<sub>2</sub>T(4-SCH<sub>3</sub>)PP(HCOO)<sub>2</sub>.** <sup>1</sup>H NMR (400 MHz, CDCl<sub>3</sub>, TMS), δ/ppm: 8.67 (s, 8H, H<sub>β</sub>), 8.5 (b, 8H, H<sub>o</sub>), 8.31 (b, 8H, H<sub>m</sub>), 2.73 (s, 12H, CH<sub>3</sub>); no signal was observed for the NH protons at 20 °C<sup>1</sup>; UV-vis in CH<sub>2</sub>Cl<sub>2</sub>, λ<sub>max</sub>/nm (logε): (See ESI,† S3-2).

**H<sub>2</sub>T(2-NO<sub>2</sub>)PP(HCOO)<sub>2</sub>.** <sup>1</sup>H NMR (400 MHz, CDCl<sub>3</sub>, TMS), δ/ppm: 8.76 (s, 8H, H<sub>β</sub>), 8.57-8.67 (m, 4H, H<sub>o</sub>), 8.71-8.73 (m, 8H, H<sub>m</sub>), 8.19-8.23 (m, 4H, H<sub>p</sub>); no signal was observed for the NH protons at 20 °C<sup>1</sup>; UV-vis in CH<sub>2</sub>Cl<sub>2</sub>, λ<sub>max</sub>/nm (logε): (See ESI,† S3-2).

**H<sub>2</sub>T(2,6-Cl)PP(HCOO)<sub>2</sub>.** <sup>1</sup>H NMR (400 MHz, CDCl<sub>3</sub>, TMS), δ/ppm: 7.87-7.90 (12H, m, H<sub>m,p</sub>), 8.95 (8H, s, H<sub>β</sub>); no signal was observed for the NH protons at 20 °C<sup>1</sup>; UV-vis in CH<sub>2</sub>Cl<sub>2</sub>, λ<sub>max</sub>/nm (logε): (See ESI,† S3-2).

S2 The UV-Vis spectral data of the free base porphyrins in CH<sub>2</sub>Cl<sub>2</sub><sup>a</sup>

| Porphyrins                |                               | Bands |       |       |       |       | $\Delta\nu_{Q(0,0), \text{Soret}}$<br>(cm <sup>-1</sup> ) |
|---------------------------|-------------------------------|-------|-------|-------|-------|-------|-----------------------------------------------------------|
|                           |                               | Soret | IV    | III   | II    | I     |                                                           |
| H <sub>2</sub> TPP        | $\lambda$ (nm)                | 417   | 513   | 548   | 590   | 647   | 8525                                                      |
|                           | $\log\epsilon$                | 5.79  | 4.58  | 4.38  | 4.30  | 4.29  |                                                           |
|                           | $f$                           | 1.734 | 0.112 | 0.035 | 0.024 | 0.015 |                                                           |
|                           | $f_{\text{Soret}}/f_{Q(0,0)}$ | 115.6 |       |       |       |       |                                                           |
| H <sub>2</sub> T(4-OMe)PP | $\lambda$ (nm)                | 421   | 517   | 555   | 593   | 651   | 8392                                                      |
|                           | $\log\epsilon$                | 5.61  | 4.32  | 4.22  | 4.06  | 4.11  |                                                           |
|                           | $f$                           | 1.510 | 0.068 | 0.037 | 0.014 | 0.014 |                                                           |
|                           | $f_{\text{Soret}}/f_{Q(0,0)}$ | 107.9 |       |       |       |       |                                                           |
| H <sub>2</sub> T(2-Me)PP  | $\lambda$ (nm)                | 416   | 512   | 545   | 589   | 645   | 8535                                                      |
|                           | $\log\epsilon$                | 6.04  | 4.74  | 4.34  | 4.34  | 4.25  |                                                           |
|                           | $f$                           | 2.210 | 0.173 | 0.039 | 0.043 | 0.018 |                                                           |
|                           | $f_{\text{Soret}}/f_{Q(0,0)}$ | 122.8 |       |       |       |       |                                                           |
| H <sub>2</sub> T(4-Me)PP  | $\lambda$ (nm)                | 418   | 516   | 551   | 590   | 647   | 8467                                                      |
|                           | $\log\epsilon$                | 5.89  | 4.54  | 4.34  | 4.18  | 4.20  |                                                           |
|                           | $f$                           | 2.710 | 0.218 | 0.091 | 0.050 | 0.037 |                                                           |
|                           | $f_{\text{Soret}}/f_{Q(0,0)}$ | 73.2  |       |       |       |       |                                                           |
| H <sub>2</sub> T(2-Cl)PP  | $\lambda$ (nm)                | 416   | 512   | 543   | 587   | 643   | 8486                                                      |
|                           | $\log\epsilon$                | 5.64  | 4.47  | 4.07  | 4.15  | 3.96  |                                                           |
|                           | $f$                           | 1.590 | 0.094 | 0.014 | 0.024 | 0.005 |                                                           |
|                           | $f_{\text{Soret}}/f_{Q(0,0)}$ | 318.0 |       |       |       |       |                                                           |
| H <sub>2</sub> T(4-Cl)PP  | $\lambda$ (nm)                | 418   | 513   | 547   | 590   | 647   | 8467                                                      |
|                           | $\log\epsilon$                | 5.79  | 4.52  | 4.25  | 4.16  | 4.10  |                                                           |
|                           | $f$                           | 2.560 | 0.190 | 0.062 | 0.045 | 0.022 |                                                           |
|                           | $f_{\text{Soret}}/f_{Q(0,0)}$ | 116.4 |       |       |       |       |                                                           |

<sup>a</sup> Oscillator strength;  $f = 4.32 \times 10^{-9} \int \epsilon_{\nu} d\nu$

**S3-1** The UV-Vis spectral data of some electron-rich and electron-deficient free base porphyrins and their dications with CF<sub>3</sub>COOH in CH<sub>2</sub>Cl<sub>2</sub><sup>a</sup>

| Porphyrins                                                                            |                               | Bands |       |       |       |       | $\Delta\nu_{Q(0,0), \text{Soret}}$<br>(cm <sup>-1</sup> ) |
|---------------------------------------------------------------------------------------|-------------------------------|-------|-------|-------|-------|-------|-----------------------------------------------------------|
|                                                                                       |                               | Soret | IV    | III   | II    | I     |                                                           |
| H <sub>2</sub> T(thien-2-yl)P <sup>b</sup>                                            | $\lambda$ (nm)                | 424   | 521   | 560   | 596   | 660   | 8433                                                      |
|                                                                                       | log $\epsilon$                | 5.39  | 4.40  | 4.28  | 4.24  | 4.24  |                                                           |
|                                                                                       | $f$                           | 1.130 | 0.054 | 0.021 | 0.011 | 0.005 |                                                           |
|                                                                                       | $f_{\text{Soret}}/f_{Q(0,0)}$ | 204   |       |       |       |       |                                                           |
|                                                                                       |                               |       |       |       |       |       |                                                           |
| H <sub>4</sub> T(thien-2-yl)P(CF <sub>3</sub> COO) <sub>2</sub> <sup>b</sup>          | $\lambda$ (nm)                | 459   | -     | -     | -     | 723   | 7955                                                      |
|                                                                                       | log $\epsilon$                | 5.53  | -     | -     | -     | 4.9   |                                                           |
|                                                                                       | $\Delta\nu$ <sup>c</sup>      | -1798 | -     | -     | -     | -1320 |                                                           |
|                                                                                       | $f$                           | 1.25  | 0.112 | 0.035 | 0.024 | 0.27  |                                                           |
|                                                                                       | $f_{\text{Soret}}/f_{Q(0,0)}$ | 4.6   |       |       |       |       |                                                           |
| H <sub>2</sub> T(4-SMe)PP <sup>b</sup>                                                | $\lambda$ (nm)                | 422   | 517   | 555   | 594   | 651   | 8336                                                      |
|                                                                                       | log $\epsilon$                | 5.64  | 4.55  | 4.46  | 4.32  | 4.39  |                                                           |
|                                                                                       | $f$                           | 1.260 | 0.058 | 0.035 | 0.015 | 0.010 |                                                           |
|                                                                                       | $f_{\text{Soret}}/f_{Q(0,0)}$ | 120   |       |       |       |       |                                                           |
|                                                                                       |                               |       |       |       |       |       |                                                           |
| H <sub>4</sub> T(4-SMe)PP(CF <sub>3</sub> COO) <sub>2</sub> <sup>b</sup>              | $\lambda$ (nm)                | 461   | -     | -     | -     | 692   | 7241                                                      |
|                                                                                       | log $\epsilon$                | 5.53  | -     | -     | -     | 4.99  |                                                           |
|                                                                                       | $\Delta\nu$ <sup>c</sup>      | -2005 | -     | -     | -     | -910  |                                                           |
|                                                                                       | $f$                           | 1.57  | -     | -     | -     | 0.35  |                                                           |
|                                                                                       | $f_{\text{Soret}}/f_{Q(0,0)}$ | 4.5   |       |       |       |       |                                                           |
| H <sub>2</sub> T(2-NO <sub>2</sub> )PP <sup>b</sup>                                   | $\lambda$ (nm)                | 420   | 516   | 550   | 593   | 650   | 8425                                                      |
|                                                                                       | log $\epsilon$                | 5.57  | 4.66  | 4.44  | 4.40  | 4.27  |                                                           |
|                                                                                       | $f$                           | 1.28  | 0.095 | 0.029 | 0.023 | 0.005 |                                                           |
|                                                                                       | $f_{\text{Soret}}/f_{Q(0,0)}$ | 264.5 |       |       |       |       |                                                           |
|                                                                                       |                               |       |       |       |       |       |                                                           |
| H <sub>4</sub> T(2-NO <sub>2</sub> )PP(CF <sub>3</sub> COO) <sub>2</sub> <sup>b</sup> | $\lambda$ (nm)                | 431   | -     | 536   | 583   | 635   | 7454                                                      |
|                                                                                       | log $\epsilon$                | 5.62  | -     | 4.47  | 4.52  | 4.67  |                                                           |
|                                                                                       | $\Delta\nu$ <sup>c</sup>      | -608  | -     | 475   | 289   | 363   |                                                           |
|                                                                                       | $f$                           | 1.27  | -     | 0.057 | 0.046 | 0.073 |                                                           |
|                                                                                       | $f_{\text{Soret}}/f_{Q(0,0)}$ | 17.4  |       |       |       |       |                                                           |
| H <sub>2</sub> T(2,6-Cl)PP <sup>d</sup>                                               | $\lambda$ (nm)                | 417   | 512   | -     | 606   | 630   | 8108                                                      |
|                                                                                       | log $\epsilon$                | 5.24  | 4.55  | -     | 4.59  | 4.51  |                                                           |
|                                                                                       | $f$                           | 0.722 | 0.057 | -     | 0.088 | 0.033 |                                                           |
|                                                                                       | $f_{\text{Soret}}/f_{Q(0,0)}$ | 21.9  |       |       |       |       |                                                           |
|                                                                                       |                               |       |       |       |       |       |                                                           |
| H <sub>2</sub> T(2,6-Cl)PP(CF <sub>3</sub> COO) <sub>2</sub>                          | $\lambda$ (nm)                | 429   | -     | -     | 580   | 612   | 8467                                                      |

|                                      |      |   |   |      |      |
|--------------------------------------|------|---|---|------|------|
| $\log \epsilon$                      | 5.24 | - | - | 4.76 | 4.58 |
| $\Delta \nu$ <sup>c</sup>            | -608 | - | - | 740  | 647  |
| $f$                                  | 0.8  | - | - | 0.15 | 0.12 |
| $f_{\text{Soret}}/f_{\text{Q}(0,0)}$ | 6.7  |   |   |      |      |

---

<sup>a</sup> See the footnotes of S2. <sup>b</sup> See the Tables and supporting information of [2]. <sup>c</sup>  $\Delta \nu$  ( $\text{cm}^{-1}$ ) =  $10^7(1/\lambda_1 - 1/\lambda_2)$ ; ( $\lambda_1$  = the wavelength of the band of the free base porphyrin;  $\lambda_2$  = the wavelength of the corresponding band of the dication). <sup>d</sup> Prepared and purified according to the literature.<sup>3</sup>

**S3-2** The UV-Vis spectral data of some electron-rich and electron-deficient free base porphyrins and their dications with HCOOH in CH<sub>2</sub>Cl<sub>2</sub><sup>a,b</sup>

| Porphyrins                                                |                               | Bands |       |       |       |       | $\Delta\nu_{Q(0,0), \text{Soret}}$<br>(cm <sup>-1</sup> ) |
|-----------------------------------------------------------|-------------------------------|-------|-------|-------|-------|-------|-----------------------------------------------------------|
|                                                           |                               | Soret | IV    | III   | II    | I     |                                                           |
| H <sub>2</sub> T(thien-2-yl)P                             | $\lambda$ (nm)                | 424   | 521   | 560   | 596   | 660   | 8433                                                      |
|                                                           | $f$                           | 1.130 | 0.054 | 0.021 | 0.011 | 0.005 |                                                           |
|                                                           | $f_{\text{Soret}}/f_{Q(0,0)}$ | 204   |       |       |       |       |                                                           |
| H <sub>4</sub> T(thien-2-yl)P(HCOO) <sub>2</sub>          | $\lambda$ (nm)                | 460   | -     | -     | -     | 732   | 8078                                                      |
|                                                           | log $\epsilon$                | 5.53  | -     | -     | -     | 4.93  |                                                           |
| $\Delta\nu^b$                                             |                               | -1846 | -     | -     | -     | -1490 |                                                           |
|                                                           | $f$                           | 1.566 | -     | -     | -     | 0.33  |                                                           |
|                                                           | $f_{\text{Soret}}/f_{Q(0,0)}$ | 4.74  |       |       |       |       |                                                           |
| H <sub>2</sub> T(4-SMe)PP                                 | $\lambda$ (nm)                | 422   | 517   | 555   | 594   | 651   | 8336                                                      |
|                                                           | $f$                           | 1.260 | 0.058 | 0.035 | 0.015 | 0.010 |                                                           |
|                                                           | $f_{\text{Soret}}/f_{Q(0,0)}$ | 120   |       |       |       |       |                                                           |
| H <sub>4</sub> T(4-SMe)PP(HCOO) <sub>2</sub>              | $\lambda$ (nm)                | 465   | -     | -     | -     | 706   | 7341                                                      |
|                                                           | log $\epsilon$                | 5.45  | -     | -     | -     | 5.04  |                                                           |
|                                                           | $\Delta\nu^b$                 | -2191 | -     | -     | -     | -1197 |                                                           |
|                                                           | $f$                           | 1.35  | -     | -     | -     | 0.35  |                                                           |
|                                                           | $f_{\text{Soret}}/f_{Q(0,0)}$ | 3.9   |       |       |       |       |                                                           |
| H <sub>2</sub> T(2-NO <sub>2</sub> )PP                    | $\lambda$ (nm)                | 420   | 516   | 550   | 593   | 650   | 8425                                                      |
|                                                           | $f$                           | 1.28  | 0.095 | 0.029 | 0.023 | 0.005 |                                                           |
|                                                           | $f_{\text{Soret}}/f_{Q(0,0)}$ | 264.5 |       |       |       |       |                                                           |
| H <sub>4</sub> T(2-NO <sub>2</sub> )PP(HCOO) <sub>2</sub> | $\lambda$ (nm)                | 431   | -     | 546   | 582   | 636   | 7454                                                      |
|                                                           | log $\epsilon$                | 5.63  | -     | 4.47  | 4.52  | 4.68  |                                                           |
|                                                           | $\Delta\nu^b$                 | -608  | -     | 133   | 319   | 339   |                                                           |
|                                                           | $f$                           | 1.53  | -     | 0.066 | 0.047 | 0.039 |                                                           |
|                                                           | $f_{\text{Soret}}/f_{Q(0,0)}$ | 39    |       |       |       |       |                                                           |
| H <sub>2</sub> T(2,6-Cl)PP                                | $\lambda$ (nm)                | 417   | 512   | -     | 606   | 630   | 8108                                                      |
|                                                           | $f$                           | 0.722 | 0.057 | -     | 0.088 | 0.033 |                                                           |
|                                                           | $f_{\text{Soret}}/f_{Q(0,0)}$ | 21.9  |       |       |       |       |                                                           |
| H <sub>2</sub> T(2,6-Cl)PP(HCOO) <sub>2</sub>             | $\lambda$ (nm)                | 425   | -     | -     | 594   | 628   | 8467                                                      |
|                                                           | log $\epsilon$                | 5.11  | -     | -     | 4.52  | 4.41  |                                                           |
|                                                           | $\Delta\nu^b$                 | -451  | -     | -     | 333   | 50    |                                                           |



|                                      |      |   |   |   |      |
|--------------------------------------|------|---|---|---|------|
| $f$                                  | 0.81 | - | - | - | 0.02 |
| $f_{\text{Soret}}/f_{\text{Q}(0,0)}$ | 40.5 |   |   |   |      |

<sup>a,b</sup> See the footnotes of S2 and S3. <sup>c</sup> See S3-3 for the structure of the porphyrins.

### S3-3 The structure of porphyrins of S3-1 and S3-2.

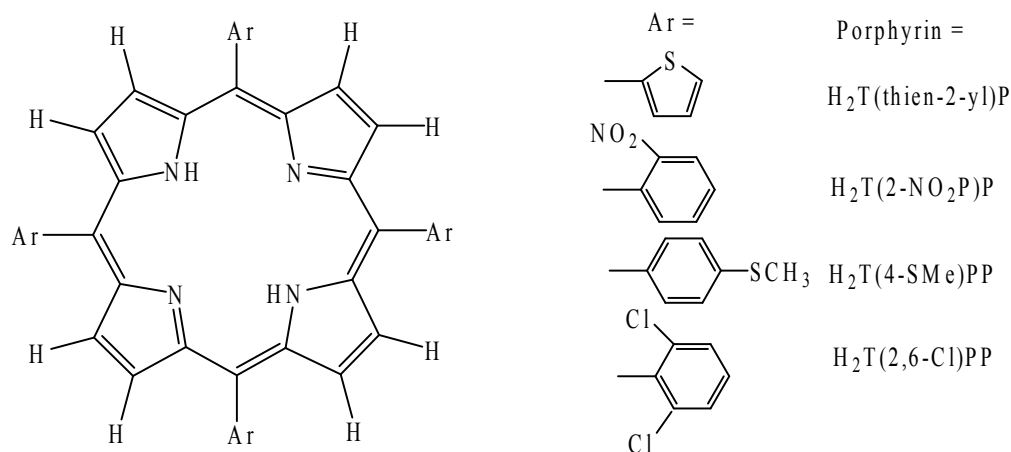

### S4 The emission spectra of the free base porphyrins in CH<sub>2</sub>Cl<sub>2</sub>

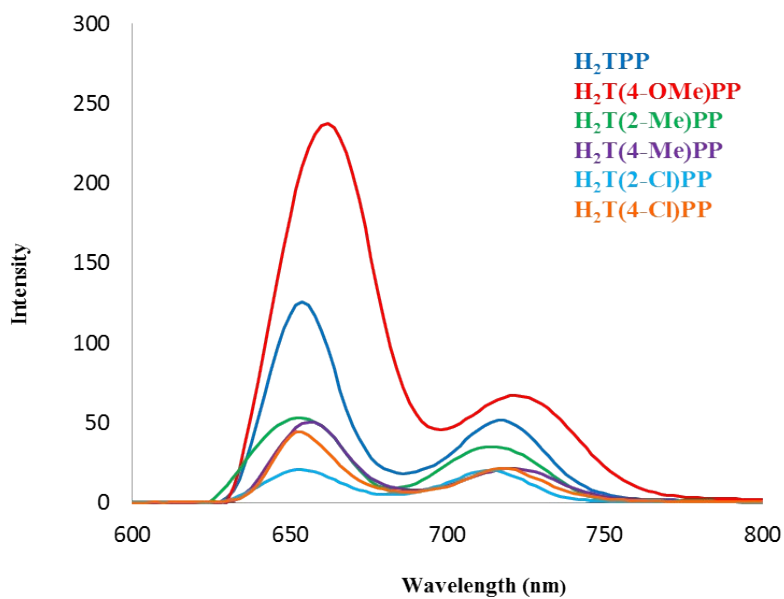

## S5 The fluorescence spectral data of the free base porphyrins in CH<sub>2</sub>Cl<sub>2</sub>

| Porphyrins                                                             | H <sub>2</sub> TPP | H <sub>2</sub> T(4-OMe)PP | H <sub>2</sub> T(2-Me)PP | H <sub>2</sub> T(4-Me)PP | H <sub>2</sub> T(2-Cl)PP | H <sub>2</sub> T(4-Cl)PP |
|------------------------------------------------------------------------|--------------------|---------------------------|--------------------------|--------------------------|--------------------------|--------------------------|
| Absorption                                                             |                    |                           |                          |                          |                          |                          |
| Q <sub>X10</sub> (λ/nm)                                                | 590                | 593                       | 589                      | 590                      | 587                      | 590                      |
| Q <sub>X00</sub> (λ/nm)                                                | 647                | 651                       | 645                      | 647                      | 643                      | 647                      |
| Splitting (Δv <sub>1</sub> /cm <sup>-1</sup> ) <sup>a</sup>            | 1493               | 1502                      | 1474                     | 1493                     | 1484                     | 1493                     |
| Emission                                                               |                    |                           |                          |                          |                          |                          |
| Q* <sub>X00</sub> (λ/nm)                                               | 654 (2.21)         | 662 (3.55)                | 652 (1.57)               | 656 (2.05)               | 654 (1.07)               | 652 (1.81)               |
| Δv <sub>1/2</sub> (cm <sup>-1</sup> )                                  | 606                | 822                       | 798                      | 603                      | 700                      | 513                      |
| Q* <sub>X01</sub> (λ/nm)                                               | 716 (1.00)         | 722 (1.00)                | 714 (1.00)               | 720 (1.00)               | 712 (1.00)               | 718 (1.00)               |
| Δv <sub>1/2</sub> (cm <sup>-1</sup> )                                  | 684                | 945                       | 785                      | 722                      | 632                      | 662                      |
| Splitting (Δv <sub>2</sub> /cm <sup>-1</sup> ) <sup>b</sup>            | 1324               | 1255                      | 1332                     | 1355                     | 1246                     | 1410                     |
| Δv <sub>3</sub> = Δv <sub>1</sub> -Δv <sub>2</sub> (cm <sup>-1</sup> ) | 169                | 247                       | 142                      | 138                      | 238                      | 83                       |
| E <sub>00</sub> (eV) <sup>c</sup>                                      | 1.91               | 1.89                      | 1.91                     | 1.90                     | 1.91                     | 1.91                     |
| Stokes shift (Δv/cm <sup>-1</sup> )                                    | 165                | 255                       | 166                      | 212                      | 262                      | 118                      |
| Φ <sub>f</sub> <sup>d</sup>                                            | 0.130              | 0.280                     | 0.073                    | 0.050                    | 0.031                    | 0.043                    |
| τ <sub>1</sub> (ns) <sup>e</sup>                                       | 34.42              | 57.04                     | 22.26                    | 17.86                    | 40.95                    | 20.57                    |
| τ <sub>2</sub> (ns) <sup>f</sup>                                       | 153.57             | 309.70                    | 89.65                    | 90.33                    | 171.42                   | 101.7                    |
| τ <sub>3</sub> (ns) <sup>g</sup>                                       | 79.35              | 130.18                    | 52.12                    | 41.55                    | 98.89                    | 48.03                    |
| Σk <sub>1</sub> (× 10 <sup>-6</sup> s <sup>-1</sup> ) <sup>h</sup>     | 29                 | 17                        | 45                       | 56                       | 24                       | 48                       |
| Σk <sub>2</sub> (× 10 <sup>-6</sup> s <sup>-1</sup> ) <sup>i</sup>     | 6                  | 3                         | 11                       | 11                       | 6                        | 10                       |
| Σk <sub>3</sub> (× 10 <sup>-6</sup> s <sup>-1</sup> ) <sup>j</sup>     | 13                 | 8                         | 19                       | 24                       | 10                       | 21                       |
| k <sub>r1</sub> (× 10 <sup>-6</sup> s <sup>-1</sup> ) <sup>k</sup>     | 3.8                | 4.9                       | 3.4                      | 2.8                      | 0.7                      | 2.1                      |
| k <sub>r2</sub> (× 10 <sup>-6</sup> s <sup>-1</sup> ) <sup>l</sup>     | 0.8                | 0.9                       | 0.8                      | 0.6                      | 0.2                      | 0.4                      |
| k <sub>r3</sub> (× 10 <sup>-6</sup> s <sup>-1</sup> ) <sup>m</sup>     | 1.7                | 2.1                       | 1.4                      | 1.2                      | 0.3                      | 0.9                      |
| k <sub>nr1</sub> (× 10 <sup>-6</sup> s <sup>-1</sup> ) <sup>n</sup>    | 25.2               | 12.6                      | 41.7                     | 53.2                     | 23.3                     | 45.9                     |
| k <sub>nr2</sub> (× 10 <sup>-6</sup> s <sup>-1</sup> ) <sup>o</sup>    | 6.1                | 2.3                       | 10.2                     | 10.4                     | 5.6                      | 9.4                      |
| k <sub>nr3</sub> (× 10 <sup>-6</sup> s <sup>-1</sup> ) <sup>p</sup>    | 11.3               | 5.5                       | 17.6                     | 22.8                     | 9.7                      | 20.1                     |

<sup>a</sup> Energy difference between the Q<sub>X10</sub> and Q<sub>X00</sub> bands. <sup>b</sup> Energy differences between the Q\*<sub>X00</sub> and Q\*<sub>X01</sub> bands. <sup>c</sup> Midpoint of Q<sub>X00</sub> and Q\*<sub>X00</sub>

maxima. <sup>d</sup>Based on a reported value of 0.13 for Q<sub>f</sub> of TPP in CH<sub>2</sub>Cl<sub>2</sub>. <sup>e</sup> τ<sub>1</sub><sup>-1</sup> = 2.880 × 10<sup>-9</sup> n<sup>2</sup>  $\frac{g_l}{g_u} \langle v^2 \rangle = \int \varepsilon(v) dv$ . <sup>f</sup> τ<sub>2</sub><sup>-1</sup> = 2.880 × 10<sup>-9</sup> n<sup>2</sup>

$$\frac{g_l}{g_u} \int \frac{(2v_0 - v)^3}{v} \varepsilon(v) dv \quad \frac{g_l}{g_u} \langle v^{-3} \rangle = \frac{-1}{av} \int \frac{\varepsilon(v)}{v} dv \quad \langle v^{-3} \rangle = \frac{-1}{av} = \frac{\int F(v) dv}{\int F(v) v^{-3} dv} \quad \tau_3^{-1} = 2.880 \times 10^{-9} \text{ n}^2 \quad \tau_1^{-1} = 2.880 \times 10^{-9} \text{ n}^2$$

<sup>g</sup> τ<sub>3</sub><sup>-1</sup> = 2.880 × 10<sup>-9</sup> n<sup>2</sup> <sup>h</sup> Σk<sub>1</sub> = τ<sub>1</sub><sup>-1</sup>. <sup>i</sup> Σk<sub>2</sub> = τ<sub>2</sub><sup>-1</sup>. <sup>j</sup> Σk<sub>3</sub> = τ<sub>3</sub><sup>-1</sup>. <sup>k</sup> k<sub>r1</sub> = Q<sub>f</sub> × Σk<sub>1</sub>. <sup>l</sup> k<sub>r2</sub> = Q<sub>f</sub> × Σk<sub>2</sub>. <sup>m</sup> k<sub>r3</sub> = Q<sub>f</sub> × Σk<sub>3</sub>. <sup>n</sup> k<sub>nr1</sub> = Σk<sub>1</sub> - k<sub>r1</sub>. <sup>o</sup> k<sub>nr2</sub> = Σk<sub>2</sub> - k<sub>r2</sub>. <sup>p</sup> k<sub>nr3</sub> = Σk<sub>3</sub> - k<sub>r3</sub>.

**S6** Absorption (Q region) and emission spectra of the porphyrin dications with  $\text{CF}_3\text{COOH}$  in  $\text{CH}_2\text{Cl}_2$  solutions normalized to each other at their respective Q maxima

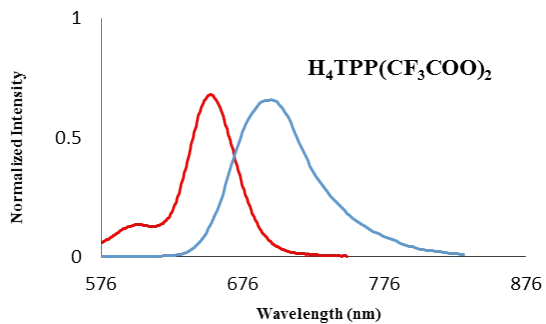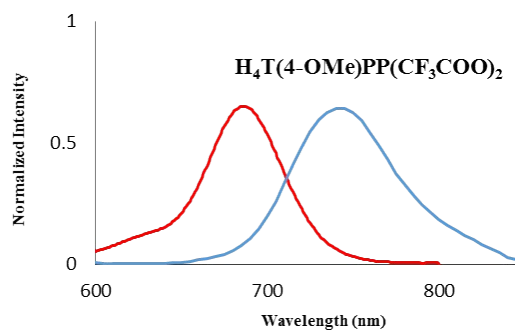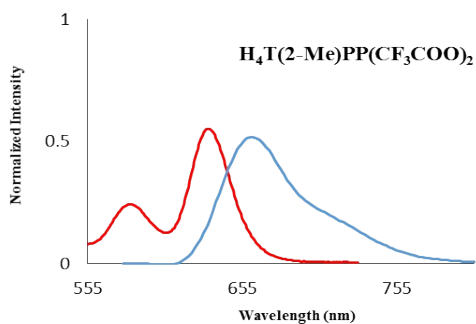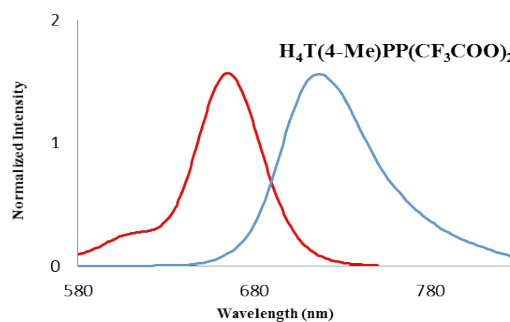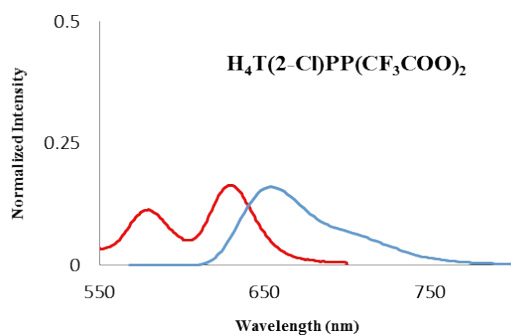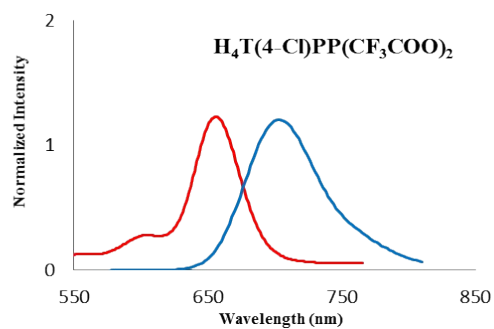

**S7** The emission spectra of the porphyrin dications with HCOOH in CH<sub>2</sub>Cl<sub>2</sub>

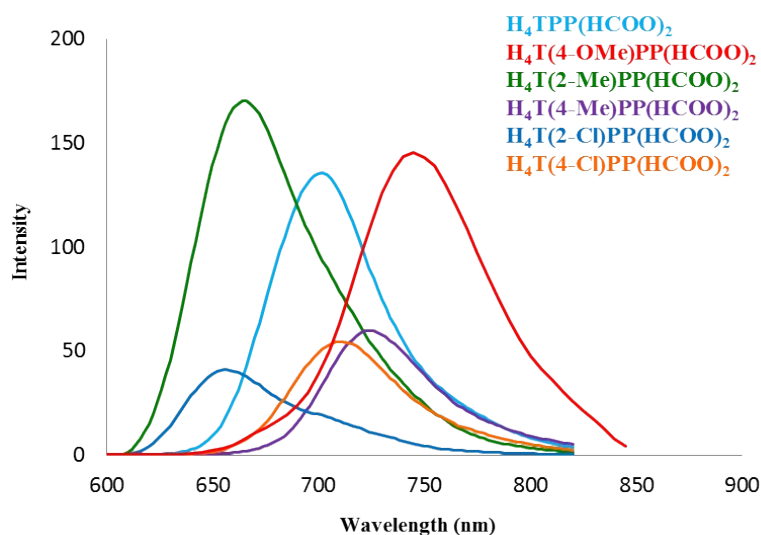

**S8** Absorption (Q region) and emission spectra of the H<sub>4</sub>T(2-Cl)PP(HCOO)<sub>2</sub> in CH<sub>2</sub>Cl<sub>2</sub> solution normalized to its Q maxima.

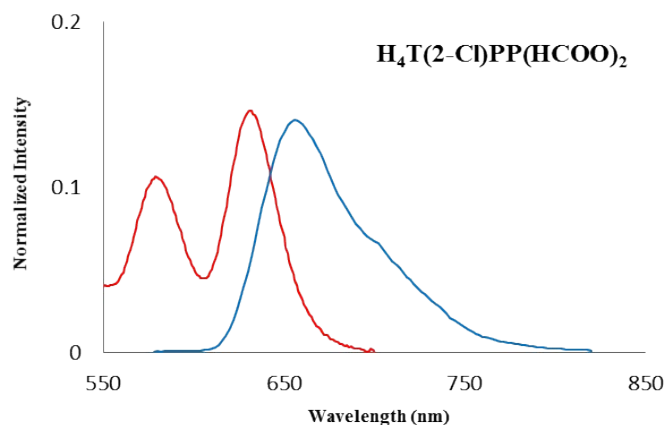

1. S. Zakavi and M. N. Ragheb, *Inorg. Chem. Commun.*, 2013, **36**, 113.
2. S. Zakavi, R. Omidyan, L. Ebrahimi and F. Heidarizadi, *Inorg. Chem. Commun.*, 2011, **14**, 1827.
3. P. Hoffmann, A. Robert and B. Meunier, *Bull. Soc. Chim. Fr.*, 1992, **129**, 85.
4. M. Bergkamp, J. Dalton and T. Netzel, *J. Am. Chem. Soc.*, 1982, **104**, 253.
5. S. Strickler and R. A. Berg, *J. Chem. Phys.*, 1962, **37**, 814.
6. G. N. Lewis and M. Kasha, *J. Am. Chem. Soc.*, 1945, **67**, 994.
7. P. G. Seybold, M. Gouterman and J. Callis, *Photochem. Photobiol.*, 1969, **9**, 229.

8. H. N. Fonda, J. V. Gilbert, R. A. Cormier, J. R. Sprague, K. Kamioka and J. S. Connolly, *J. Phys. Chem.*, 1993, **97**, 7024.
